# Supplementary material
Source: PubMed Central journal article supplement (PMC545557)

**a**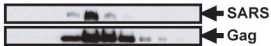**b**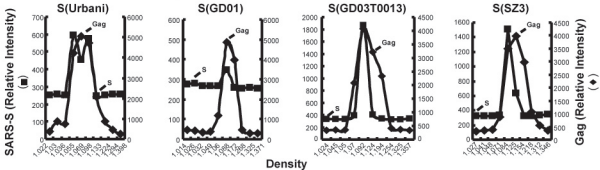

Supplement: pnas_102_3_797__1.pdf [file pnas_102_3_797__1.pdf]
